# Supplementary material for: Engineering Pt-O coordination microenvironment toward an active, durable, and antipoisoning catalyst in CO oxidation
Source: Research Square preprint supplement (doi:10.21203/rs.3.rs-5859679/v1), 2025-01-31
Supplement: Supplementary file 1 [file 02cd6ae2bc458acc2899566e.docx]

**Supplementary Information**

**Engineering Pt-O coordination microenvironment toward an active, durable, and antipoisoning catalyst in CO oxidation**

*Bao-Ju Wang,1,2,5 Xin Zhang,1,5 Wenyao Chen,3,5 Hongzi Tan,2 Hailong Liao,1 Xiangxue Zhang,3 Dingsheng Wang,4 Xuezhi Duan,3✉ Yong Luo, 1✉ Jian-Feng Chen1*

1State Key Laboratory of Organic-Inorganic Composites, Research Center of the Ministry of Education for High Gravity Engineering and Technology, Beijing University of Chemical Technology, Beijing 100029, China
2School of Chemistry and Chemical Engineering, Shandong University of Technology, Zibo 255000, China
3State Key Laboratory of Chemical Engineering, School of Chemical Engineering, East China University of Science and Technology, Shanghai 200237, China
4Department of Chemistry, Tsinghua University, Beijing, China

5These authors contributed equally: Bao-Ju Wang,Xin Zhang, Wenyao Chen

✉E-mail: [luoyong@mail.buct.edu.cn](mailto:luoyong@mail.buct.edu.cn); [xzduan@ecust.edu.cn](mailto:xzduan@ecust.edu.cn)

**Supplementary Note 1**

**Mass transfer calculations for CO oxidation over the Pt(Na)/CeO2 catalyst**

(1) Mears criterion for external diffusion

If , then exteral mass transfer effects can be neglected.

Where = observed reaction rate, mol/kgcat·s

= bulk density of catalyst bed, kg/m3

= catalyst particle radius, m

= reaction order

= external mass transfer coefficient, m/s

= bulk gas concentration of CO, mol/m3

As a result,

(2) Weisz-Prater criterion for internal diffusion

If , then internal mass transfer effects can be neglected.

Where *ρ*c = density of solid catalyst, kg/m3

*D*eff = effective diffusivity, m2/s

*C*s = gas concentration of CO at the external surface of the catalyst, mol/m3

As a result,

Supplementary Table 1. Comparison of CO oxidation performance with the presence of C3H6 catalyzed by noble metal catalysts

| Catalyst | T90 (oC) | TOF at 100 oC (s-1) | Reference |
| --- | --- | --- | --- |
| Pt/CeO2 | 145 | 0.052 | 1 |
| Pd/CeO2 | 138 | 0.065 | 2 |
| Pt/CeO2 | 319 | 0.019 | This work |
| Pt(Na)/CeO2 | 124 | 0.312 | This work |

References:

[1] Jones, J.; Xiong, H.; DeLaRiva, A. T.; Peterson, E. J.; Pham, H.; Challa, S. R.; Qi G.; Oh, S.; Wiebenga, M. H.; Hernández, X. I. P.; Wang, Y.; Datye, A. K. Thermally stable single-atom platinum-on-ceria catalysts via atom trapping. *Science*, **2016**, *353*, 150-154.

[2] Jeong, H.; Bae, J.; Han, J. W.; Lee H. Promoting effects of hydrothermal treatment on the activity and durability of Pd/CeO2 catalysts for CO oxidation. *ACS Catal.* **2017**, *7*, 7097-7105.

Supplementary Table 2. Structure parameters of synthesized catalysts

| Sample | Actual Pt loading (wt.%) | Actual Na loading (wt. %) | Pt particle size (nm) | BET surface areas (m2/g) |
| --- | --- | --- | --- | --- |
| Pt/CeO2-O | 0.98 | 0 | 0.68 ± 0.13 | 103.4 |
| Pt/CeO2 | 0.98 | 0 | 0.63 ± 0.08 | 104.6 |
| Pt(Na)/CeO2-O | 0.95 | 0.1 | Single atom | 98.7 |
| Pt(Na)/CeO2 | 0.95 | 0.06 | 0.76 ± 0.09 | 95.5 |

Pt/CeO2-O and Pt(Na)/CeO2-O refer to the catalysts without reduction treatment.

Actual Pt and Na loadings were characterized by ICP-MS.

Pt particle size was counted over 150 observed platinum species on high-magnification images.

BET surface area was obtained from N2-physisorption characterization.

Supplementary Table 3. EXAFS fitting parameters at the Pt L3-edge for various samples（*Ѕ*02=0.86）

| Sample | Shell | *Na* | *R*(Å)*b* | *σ*2×103(Å2)*c* | Δ*E*0 (eV)*d* | *R* factor |
| --- | --- | --- | --- | --- | --- | --- |
| Pt(Na)/CeO2 | Pt-O | 1.9±0.3 | 2.01±0.01 | 7.7±2.3 | 12.8±1.4 | 0.006 |
| Pt/CeO2 | Pt-O | 3.7±0.3 | 2.04±0.01 | 6.6±2.2 | 17.6±0.1 | 0.006 |
| Pt foil | Pt-Pt | 12* | 2.76±0.01 | 4.8±0.1 | 7.6±0.3 | 0.001 |
| PtO2 | Pt-O | 5.6±0.5 | 2.02±0.01 | 1.9±0.5 | 11.4±1.1 | 0.004 |

*aN*: coordination numbers; *bR*: bond distance; *cσ*2: Debye-Waller factors; *d* Δ*E*0: the inner potential correction. *R* factor: goodness of fit.

**Supplementary Fig. 1.** Cycling test of CO oxidation catalyzed by Pt/CeO2 and Pt(Na)/CeO2 catalysts.

**Supplementary Fig. 2** CO oxidation activity of Pt/CeO2 and Pt(Na)/CeO2 catalysts before and after individually introducing NO flow into reaction system. Pt/CeO2-NO and Pt(Na)/CeO2-NO refer to the catalysts evaluated with the existence of NO flow.


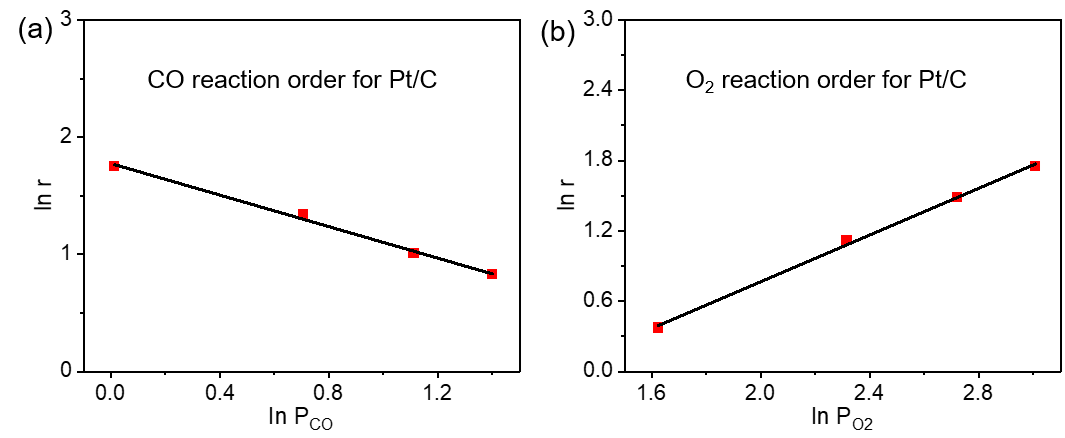


**Supplementary Fig. 3** Kinetic reaction orders of CO and O2 for Pt/C catalyst reported by Chen et al.1

References:

[1] Chen, W.; Liu, C.; Lian, C.; Yu, Y.; Zhang, X.; Qian, G.; Yang, J.; Chen, D.; Zhou, X.; Yuan, W.; Duan, X. Engineering electronic platinum-carbon support interaction to tame carbon monoxide activation. *Fundamental Research* **2024**, *5*, 1118-1127.


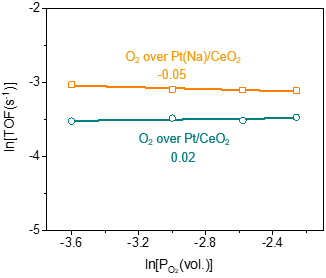


**Supplementary Fig. 4** Reaction orders of O2 overPt/CeO2 and Pt(Na)/CeO2 catalysts.


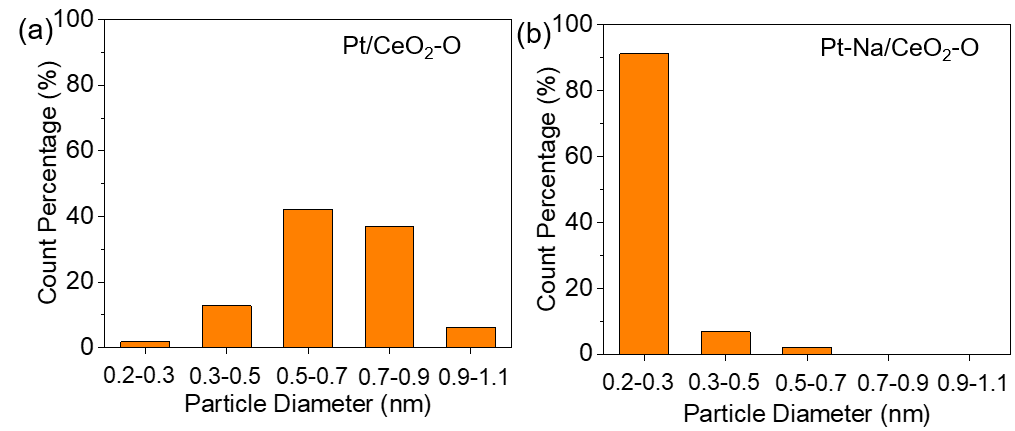


**Supplementary Fig. 5** Count frequency of Pt species in (a) Pt/CeO2-O and (b) Pt(Na)/CeO2-O catalysts. Pt/CeO2-O and Pt(Na)/CeO2-O refer to the catalysts without reduction treatment. The size distribution is based on over 150 observed platinum species counted from the high-magnification images.


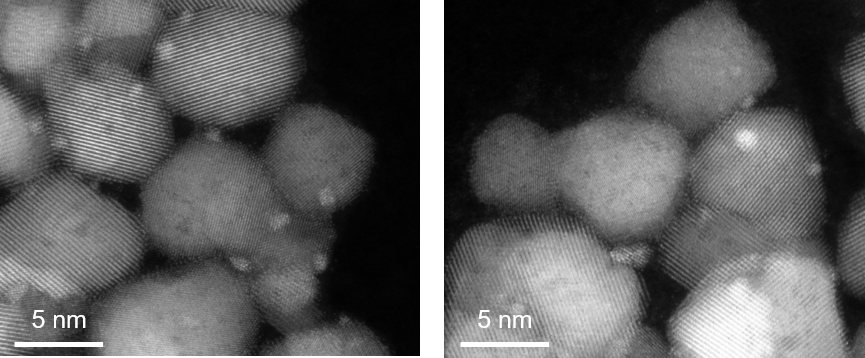


**Supplementary Fig. 6** HAADF-STEM image of Pt species on Pt/CeO2 catalyst after reduction-treatment.


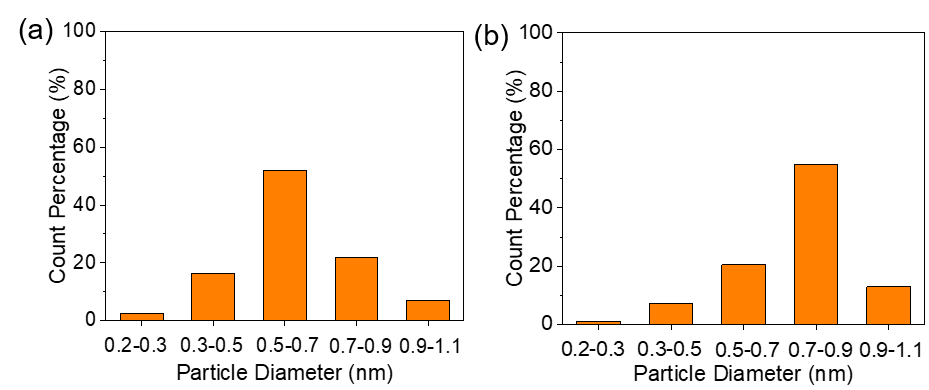


**Supplementary Fig. 7** Count frequency of Pt species in Pt/CeO2 and Pt(Na)/CeO2 catalysts. The size distribution is based on over 150 observed platinum species counted from the high-magnification images (Both images recorded at 8 M× original magnification).

**Supplementary Fig. 8** *In situ* DRIFTS spectra of CO adsorption of Pt/CeO2-O and Pt(Na)/CeO2-O. Pt/CeO2-O and Pt(Na)/CeO2-O refer to the catalysts without reduction treatment.


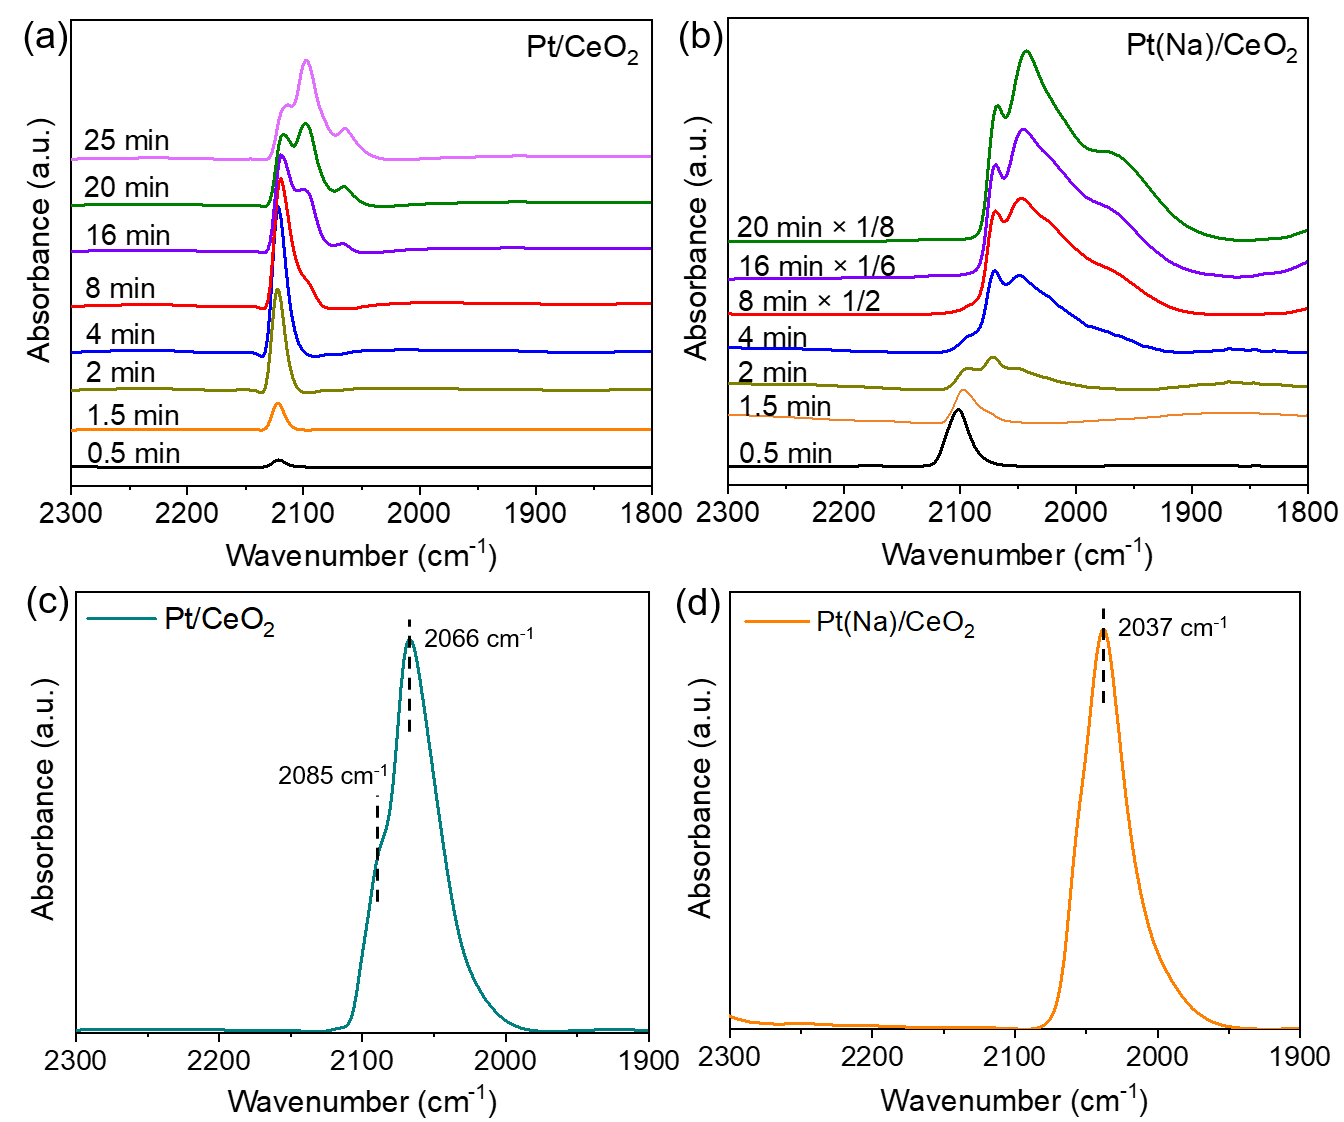


**Supplementary Fig. 9** (a-b) Record of *in situ* DRIFTS spectra of CO adsorption under reduction process; (c-d) *In-situ* DRIFT of adsorbed CO on Pt/CeO2 and Pt(Na)/CeO2, respectively. On Pt/CeO2, the band centered at 2085 cm-1 is assigned to CO on well-coordinated Ptmetal sites, CO-Ptmetal,WC, the band centered at 2066 cm-1 is assigned to CO on under-coordinated Ptmetal sites, CO-Ptmetal,UC; On Pt(Na)/CeO2, the band centered at 2037 cm-1 arises from CO on Pt sites with ultra-low Pt-O coordination.

**Supplementary Fig. 10** Na 1s XPS spectra of Pt(Na)/CeO2 catalyst before and after reduction treatment.


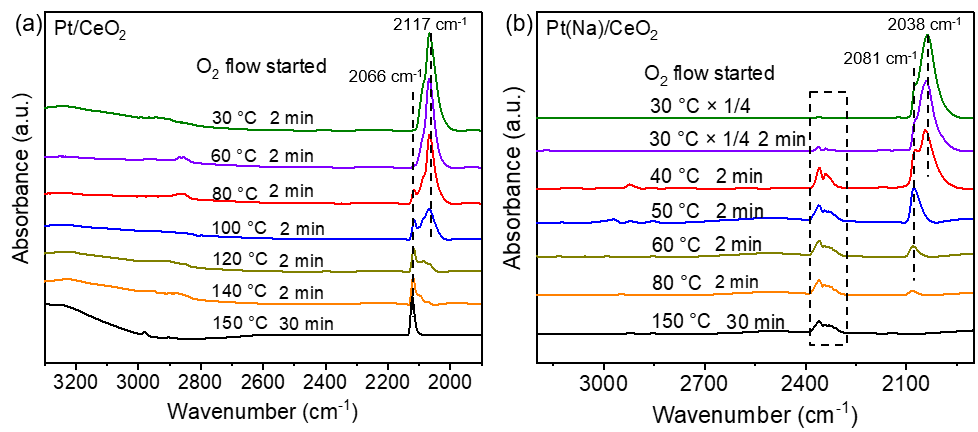


**Supplementary Fig. 11** (a-b) *In situ* DRIFTS of CO oxidation over Pt/CeO2 and Pt(Na)/CeO2 catalysts, respectively. The adsorption peaks in the range of 2800 ~ 3200 cm-1 attributed to the C-H stretching bands. During CO oxidation reaction, no C-H species are formed. The adsorption peaks in the range of 2250 ~ 2400 cm-1 were assigned to the formed CO2.


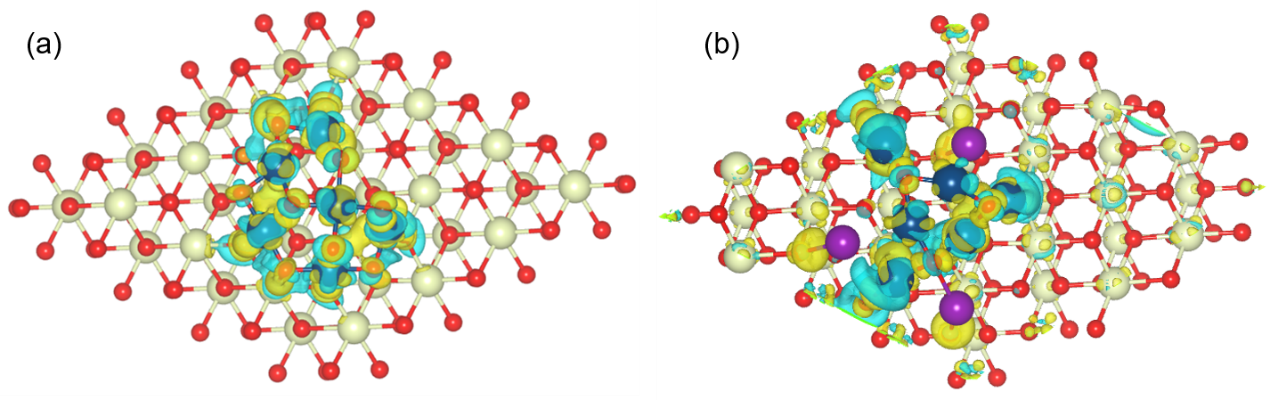


**Supplementary Fig. 12** Top view of differential charge density results of (a) Pt/CeO2 and (b) Pt(Na)/CeO2 catalysts. The yellow shading represents electron loss, while the blue shading indicates electron gain. In the Pt/CeO2 catalyst, the Pt sites exhibit a tendency to lose electrons, with a higher electron density at the surface oxygen of ceia. In the Pt(Na)/CeO2 catalyst, the electron density around the Pt is greater, and the ceria surface shows a trend of electron loss. The Na+-modification alters the direction of electron transfer, thereby adjusting the local microenvironment of Pt-O coordination.


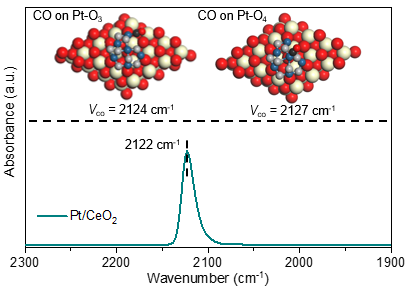


**Supplementary Fig. 13** *In situ* DRIFTS spectra of CO adsorption after CO oxidation for Pt/CeO2, DFT-predicted CO adsorption modes are shown inset on Pt6O8/CeO2. Color legend of atoms: Pt = blue, Ce = beige, O (in CeO2 and CO) = red, O (Pt5O8) = gray, C = black.


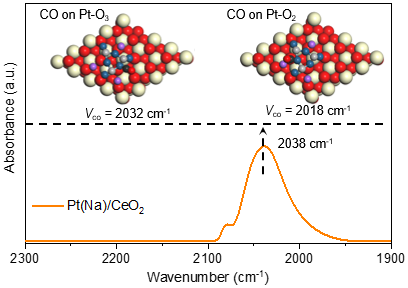


**Supplementary Fig. 14** *In situ* DRIFTS spectra of CO adsorption for Pt(Na)/CeO2, DFT-predicted CO adsorption modes are shown inset on Pt6Na3O3/CeO2. Color legend of atoms: Pt = blue, Ce = beige, O (in CeO2 and CO) = red, O (Pt5O8) = gray, C = black.


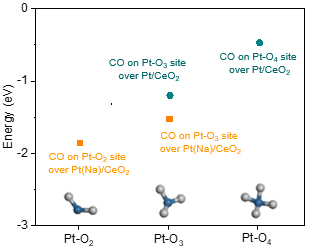


**Supplementary Fig. 15** CO adsorption energy on Pt-O2, Pt-O3, and Pt-O4 sites of Pt/CeO2 and Pt(Na)/CeO2 catalysts.
